# Supplementary material for: Functional Frailty, Dietary Intake, and Risk of Malnutrition. Are Nutrients Involved in Muscle Synthesis the Key for Frailty Prevention?
Source: MDPI journal article supplement (doi:10.3390/nu13041231), 2021-04-08
Supplement: s1 [file s1]

Supplementary material, Table S1. Data about graphs; ANCOVA considering robust as reference group

| Nutrient intake                  | Robust | Pre-Frail           | Frail            |
|----------------------------------|--------|---------------------|------------------|
| Carbohydrates (g/day)            | Ref    | 26.9±14.0           | <b>44.9±16.4</b> |
| Protein (g/day)                  | Ref    | <b>-11.0±5.1</b>    | <b>-13.4±6.0</b> |
| Total fat (g/day)                | Ref    | -8.6±5.4            | <b>-13.0±6.4</b> |
| Alcohol (g/day)                  | Ref    | 2.0±2.7             | -1.3±3.1         |
| w-3 (g/day)                      | Ref    | -0.4±0.4            | <b>-1.1±0.4</b>  |
| w-6 (g/day)                      | Ref    | 1.3±1.8             | -1.0±2.1         |
| MUFA (g/day)                     | Ref    | -2.6±3.8            | -4.6±4.4         |
| PUFA (g/day)                     | Ref    | 1.0±1.0             | -1.9±2.4         |
| SFA (g/day)                      | Ref    | <b>-6.2±2.2</b>     | <b>-6.6±2.6</b>  |
| Retinol equivalents (µg/day)     | Ref    | -125.8±206.7        | -267.9±243.1     |
| Vitamin D (µg/day)               | Ref    | -1.8±1.1            | <b>-3.2±1.3</b>  |
| Vitamin E (mg/day)               | Ref    | 0.6±0.5             | 0.7±1.0          |
| Ascorbic acid (C) (mg/day)       | Ref    | -33.3±35.7          | -69.3±42.0       |
| Tiamin (B1) (mg/day)             | Ref    | -0.2±0.5            | -0.2±0.3         |
| Riboflavin (B2) (mg/day)         | Ref    | -0.2±0.3            | -0.3±0.2         |
| Niacin equivalents (B3) (mg/day) | Ref    | <b>-5.5±2.7</b>     | <b>-7.4±3.2</b>  |
| Pyridoxine (B6) (mg/day)         | Ref    | -0.1±0.2            | <b>-0.4±0.2</b>  |
| Folic acid (B9) (µg/day)         | Ref    | -10.7±36.9          | -55.9±43.4       |
| Cobalamin (B12) (µg/day)         | Ref    | -1.4±1.4            | -2.4±1.6         |
| Calcium (mg/day)                 | Ref    | -172.1±107.1        | -154.3±126.1     |
| Iron (mg/day)                    | Ref    | -0.3±1.0            | -0.3±1.3         |
| Sodium (mg/day)                  | Ref    | -258.7±172.1        | -78.0±202.4      |
| Magnesium (mg/day)               | Ref    | -17.5±25.4          | -18.4±29.9       |
| Potassium (mg/day)               | Ref    | -114.8±315.3        | -536.3±370.9     |
| Iodine (µg/day)                  | Ref    | 32.0±0.5            | 68.5±56.8        |
| Selenium (µg/day)                | Ref    | -9.5±7.6            | -10.2±8.9        |
| Zinc (mg/day)                    | Ref    | -1.0±0.7            | -0.7±0.8         |
| Phosphorus (mg/day)              | Ref    | <b>-265.5±118.7</b> | -237.7±139.7     |

\* Bold letter represents statistically significant difference comparing with the robust.
